# Supplementary material
Source: Frontiers journal article supplement (https://www.frontiersin.org/articles/324170)
Supplement: Table_10.XLS [file Table_10.XLS]

## Sheet: 查询1
Table S10. IHD-associated targets in DrugBank database
Drug IDs	Type	ID	Name	Gene Name
DB08814	approved	P35228	Nitric oxide synthase, inducible	NOS2
DB01412	approved	P30542	Adenosine receptor A1	ADORA1
DB00712	approved	P23219	Prostaglandin G/H synthase 1	PTGS1
DB00749	approved	P23219	Prostaglandin G/H synthase 1	PTGS1
DB00861	approved	P23219	Prostaglandin G/H synthase 1	PTGS1
DB00945	approved	P23219	Prostaglandin G/H synthase 1	PTGS1
DB08814	approved	P23219	Prostaglandin G/H synthase 1	PTGS1
DB00165	approved	O00764	Pyridoxal kinase	PDXK
DB00622	approved	P20309	Muscarinic acetylcholine receptor M3	CHRM3
DB00006	approved	P00734	Prothrombin	F2
DB01197	approved	P14780	Matrix metalloproteinase-9
DB00177	approved	P30556	Type-1 angiotensin II receptor	AGTR1
DB00678	approved	P30556	Type-1 angiotensin II receptor	AGTR1
DB00796	approved	P30556	Type-1 angiotensin II receptor	AGTR1
DB00163	approved	Q9UDX3	SEC14-like protein 4	SEC14L4
DB00622	approved	P11229	Muscarinic acetylcholine receptor M1	CHRM1
DB00758	approved	Q9H244	P2Y purinoceptor 12	P2RY12
DB06209	approved	Q9H244	P2Y purinoceptor 12	P2RY12
DB08816	approved	Q9H244	P2Y purinoceptor 12	P2RY12
DB01364	approved	Q05940	Synaptic vesicular amine transporter	SLC18A2
DB00945	approved	Q04828	Aldo-keto reductase family 1 member C1	AKR1C1
DB06779	approved	P15692	Vascular endothelial growth factor A	VEGFA
DB08885	approved	P15692	Vascular endothelial growth factor A	VEGFA
DB00195	approved	P08588	Beta-1 adrenergic receptor	ADRB1
DB00264	approved	P08588	Beta-1 adrenergic receptor	ADRB1
DB00335	approved	P08588	Beta-1 adrenergic receptor	ADRB1
DB00571	approved	P08588	Beta-1 adrenergic receptor	ADRB1
DB00598	approved	P08588	Beta-1 adrenergic receptor	ADRB1
DB00612	approved	P08588	Beta-1 adrenergic receptor	ADRB1
DB01102	approved	P08588	Beta-1 adrenergic receptor	ADRB1
DB01203	approved	P08588	Beta-1 adrenergic receptor	ADRB1
DB01295	approved	P08588	Beta-1 adrenergic receptor	ADRB1
DB01359	approved	P08588	Beta-1 adrenergic receptor	ADRB1
DB01580	approved	P08588	Beta-1 adrenergic receptor	ADRB1
DB00281	approved	Q9Y5Y9	Sodium channel protein type 10 subunit alpha	SCN10A
DB01074	approved	P23786	Carnitine O-palmitoyltransferase 2, mitochondrial	CPT2
DB00281	approved	Q14524	Sodium channel protein type 5 subunit alpha	SCN5A
DB01035	approved	Q14524	Sodium channel protein type 5 subunit alpha	SCN5A
DB00009	approved	P00747	Plasminogen	PLG
DB00015	approved	P00747	Plasminogen	PLG
DB00029	approved	P00747	Plasminogen	PLG
DB00031	approved	P00747	Plasminogen	PLG
DB00086	approved	P00747	Plasminogen	PLG
DB00569	approved	P00742	Coagulation factor X	F10
DB00569	approved	P00742	Coagulation factor X	F10
DB01109	approved	P00742	Coagulation factor X	F10
DB01225	approved	P00742	Coagulation factor X	F10
DB00178	approved	P12821	Angiotensin-converting enzyme	ACE
DB00519	approved	P12821	Angiotensin-converting enzyme	ACE
DB00542	approved	P12821	Angiotensin-converting enzyme	ACE
DB00722	approved	P12821	Angiotensin-converting enzyme	ACE
DB00790	approved	P12821	Angiotensin-converting enzyme	ACE
DB01197	approved	P12821	Angiotensin-converting enzyme	ACE
DB00009	approved	P05121	Plasminogen activator inhibitor 1	SERPINE1
DB00015	approved	P05121	Plasminogen activator inhibitor 1	SERPINE1
DB00029	approved	P05121	Plasminogen activator inhibitor 1	SERPINE1
DB00031	approved	P05121	Plasminogen activator inhibitor 1	SERPINE1
DB00622	approved	P08912	Muscarinic acetylcholine receptor M5	CHRM5
DB00163	approved	P09917	Arachidonate 5-lipoxygenase	ALOX5
DB00163	approved	O76054	SEC14-like protein 2	SEC14L2
DB00712	approved	P35354	Prostaglandin G/H synthase 2	PTGS2
DB00749	approved	P35354	Prostaglandin G/H synthase 2	PTGS2
DB00861	approved	P35354	Prostaglandin G/H synthase 2	PTGS2
DB00945	approved	P35354	Prostaglandin G/H synthase 2	PTGS2
DB00381	approved	P00915	Carbonic anhydrase 1	CA1
DB00569	approved	P01008	Antithrombin-III	SERPINC1
DB00569	approved	P01008	Antithrombin-III	SERPINC1
DB01109	approved	P01008	Antithrombin-III	SERPINC1
DB01225	approved	P01008	Antithrombin-III	SERPINC1
DB06779	approved	P01008	Antithrombin-III	SERPINC1
DB08813	approved	P01008	Antithrombin-III	SERPINC1
DB00571	approved	P08908	5-hydroxytryptamine receptor 1A	HTR1A
DB01359	approved	P08908	5-hydroxytryptamine receptor 1A	HTR1A
DB00163	approved	Q9UDX4	SEC14-like protein 3	SEC14L3
DB01244	approved	O00555	Voltage-dependent P/Q-type calcium channel subunit alpha-1A	CACNA1A
DB00105	approved	P48551	Interferon alpha/beta receptor 2	IFNAR2
DB00622	approved	P08173	Muscarinic acetylcholine receptor M4	CHRM4
DB01074	approved	P50416	Carnitine O-palmitoyltransferase 1, liver isoform	CPT1A
DB00749	approved	P19793	Retinoic acid receptor RXR-alpha	RXRA
DB00622	approved	P62158	Calmodulin	CALM1
DB01115	approved	P62158	Calmodulin	CALM1
DB01244	approved	P62158	Calmodulin	CALM1
DB01452	approved	P41143	Delta-type opioid receptor	OPRD1
DB01364	approved	P22303	Acetylcholinesterase	ACHE
DB00381	approved	Q13936	Voltage-dependent L-type calcium channel subunit alpha-1C	CACNA1C
DB00401	approved	Q13936	Voltage-dependent L-type calcium channel subunit alpha-1C	CACNA1C
DB00622	approved	Q13936	Voltage-dependent L-type calcium channel subunit alpha-1C	CACNA1C
DB01054	approved	Q13936	Voltage-dependent L-type calcium channel subunit alpha-1C	CACNA1C
DB01115	approved	Q13936	Voltage-dependent L-type calcium channel subunit alpha-1C	CACNA1C
DB06712	approved	Q13936	Voltage-dependent L-type calcium channel subunit alpha-1C	CACNA1C
DB00054	approved	P08514	Integrin alpha-IIb	ITGA2B
DB00775	approved	P08514	Integrin alpha-IIb	ITGA2B
DB01075	approved	P35367	Histamine H1 receptor	HRH1
DB01364	approved	P23975	Sodium-dependent noradrenaline transporter	SLC6A2
DB01113	approved	Q07343	cAMP-specific 3',5'-cyclic phosphodiesterase 4B	PDE4B
DB01412	approved	Q07343	cAMP-specific 3',5'-cyclic phosphodiesterase 4B	PDE4B
DB00622	approved	P35348	Alpha-1A adrenergic receptor	ADRA1A
DB01295	approved	P35348	Alpha-1A adrenergic receptor	ADRA1A
DB01364	approved	P35348	Alpha-1A adrenergic receptor	ADRA1A
DB00227	approved	P20701	Integrin alpha-L	ITGAL
DB00945	approved	P25101	Endothelin-1 receptor	EDNRA
DB00009	approved	P02671	Fibrinogen alpha chain	FGA
DB00015	approved	P02671	Fibrinogen alpha chain	FGA
DB00029	approved	P02671	Fibrinogen alpha chain	FGA
DB00031	approved	P02671	Fibrinogen alpha chain	FGA
DB00727	approved	P16066	Atrial natriuretic peptide receptor 1	NPR1
DB00727	approved	P16066	Atrial natriuretic peptide receptor 1	NPR1
DB00883	approved	P16066	Atrial natriuretic peptide receptor 1	NPR1
DB01612	approved	P16066	Atrial natriuretic peptide receptor 1	NPR1
DB00622	approved	P08172	Muscarinic acetylcholine receptor M2	CHRM2
DB00227	approved	P04035	3-hydroxy-3-methylglutaryl-coenzyme A reductase	HMGCR
DB01076	approved	P04035	3-hydroxy-3-methylglutaryl-coenzyme A reductase	HMGCR
DB01095	approved	P04035	3-hydroxy-3-methylglutaryl-coenzyme A reductase	HMGCR
DB01098	approved	P04035	3-hydroxy-3-methylglutaryl-coenzyme A reductase	HMGCR
DB00622	approved	P35368	Alpha-1B adrenergic receptor	ADRA1B
DB01113	approved	Q9Y233	cAMP and cAMP-inhibited cGMP 3',5'-cyclic phosphodiesterase 10A	PDE10A
DB08814	approved	Q9Y233	cAMP and cAMP-inhibited cGMP 3',5'-cyclic phosphodiesterase 10A	PDE10A
DB01452	approved	P41145	Kappa-type opioid receptor	OPRK1
DB01197	approved	P08253	72 kDa type IV collagenase	MMP2
DB00105	approved	P17181	Interferon alpha/beta receptor 1	IFNAR1
DB00700	approved	P08235	Mineralocorticoid receptor	NR3C2
DB01244	approved	P51787	Potassium voltage-gated channel subfamily KQT member 1	KCNQ1
DB00343	approved	Q06432	Voltage-dependent calcium channel gamma-1 subunit	CACNG1
DB00528	approved	Q06432	Voltage-dependent calcium channel gamma-1 subunit	CACNG1
DB01054	approved	Q06432	Voltage-dependent calcium channel gamma-1 subunit	CACNG1
DB00381	approved	P54289	Voltage-dependent calcium channel subunit alpha-2/delta-1	CACNA2D1
DB00401	approved	P54289	Voltage-dependent calcium channel subunit alpha-2/delta-1	CACNA2D1
DB00622	approved	P54289	Voltage-dependent calcium channel subunit alpha-2/delta-1	CACNA2D1
DB01054	approved	P54289	Voltage-dependent calcium channel subunit alpha-2/delta-1	CACNA2D1
DB01115	approved	P54289	Voltage-dependent calcium channel subunit alpha-2/delta-1	CACNA2D1
DB06712	approved	P54289	Voltage-dependent calcium channel subunit alpha-2/delta-1	CACNA2D1
DB00195	approved	P07550	Beta-2 adrenergic receptor	ADRB2
DB00264	approved	P07550	Beta-2 adrenergic receptor	ADRB2
DB00335	approved	P07550	Beta-2 adrenergic receptor	ADRB2
DB00571	approved	P07550	Beta-2 adrenergic receptor	ADRB2
DB00598	approved	P07550	Beta-2 adrenergic receptor	ADRB2
DB00612	approved	P07550	Beta-2 adrenergic receptor	ADRB2
DB01102	approved	P07550	Beta-2 adrenergic receptor	ADRB2
DB01203	approved	P07550	Beta-2 adrenergic receptor	ADRB2
DB01295	approved	P07550	Beta-2 adrenergic receptor	ADRB2
DB01359	approved	P07550	Beta-2 adrenergic receptor	ADRB2
DB01580	approved	P07550	Beta-2 adrenergic receptor	ADRB2
DB00054	approved	P12314	High affinity immunoglobulin gamma Fc receptor I	FCGR1A
DB01418	approved	Q9BQB6	Vitamin K epoxide reductase complex subunit 1	VKORC1
DB00622	approved	P25100	Alpha-1D adrenergic receptor	ADRA1D
DB00009	approved	Q03405	Urokinase plasminogen activator surface receptor	PLAUR
DB00015	approved	Q03405	Urokinase plasminogen activator surface receptor	PLAUR
DB00029	approved	Q03405	Urokinase plasminogen activator surface receptor	PLAUR
DB00031	approved	Q03405	Urokinase plasminogen activator surface receptor	PLAUR
DB01244	approved	P05023	Sodium/potassium-transporting ATPase subunit alpha-1	ATP1A1
DB01207	approved	P21731	Thromboxane A2 receptor	TBXA2R
DB00281	approved	P00533	Epidermal growth factor receptor	EGFR
DB01452	approved	P35372	Mu-type opioid receptor	OPRM1
DB01115	approved	Q09470	Potassium voltage-gated channel subfamily A member 1	KCNA1
DB00571	approved	P28222	5-hydroxytryptamine receptor 1B	HTR1B
DB01359	approved	P28222	5-hydroxytryptamine receptor 1B	HTR1B
DB01076	approved	P27487	Dipeptidyl peptidase 4	DPP4
DB01054	approved	O95180	Voltage-dependent T-type calcium channel subunit alpha-1H	CACNA1H
DB01115	approved	O95180	Voltage-dependent T-type calcium channel subunit alpha-1H	CACNA1H
DB01244	approved	O95180	Voltage-dependent T-type calcium channel subunit alpha-1H	CACNA1H
DB00163	approved	P05771	Protein kinase C beta type	PRKCB
DB01035	approved	P26358	DNA (cytosine-5)-methyltransferase 1	DNMT1
DB00054	approved	O75015	Low affinity immunoglobulin gamma Fc region receptor III-B	FCGR3B
DB01412	approved	P29274	Adenosine receptor A2a	ADORA2A
DB06213	approved	P29274	Adenosine receptor A2a	ADORA2A
DB00086	approved	P25116	Proteinase-activated receptor 1	F2R
DB00163	approved	O75469	Nuclear receptor subfamily 1 group I member 2	NR1I2
DB06779	approved	P10646	Tissue factor pathway inhibitor	TFPI
DB00031	approved	P05120	Plasminogen activator inhibitor 2	SERPINB2
DB00381	approved	P17405	Sphingomyelin phosphodiesterase	SMPD1
DB00722	approved	Q9BYF1	Angiotensin-converting enzyme 2	ACE2
DB00031	approved	P27824	Calnexin	CANX
DB00571	approved	P13945	Beta-3 adrenergic receptor	ADRB3
DB01102	approved	P13945	Beta-3 adrenergic receptor	ADRB3
DB01244	approved	P63316	Troponin C, slow skeletal and cardiac muscles	TNNC1
DB00054	approved	P04004	Vitronectin	VTN
DB08814	approved	P19838	Nuclear factor NF-kappa-B p105 subunit	NFKB1
DB00945	approved	P11021	78 kDa glucose-regulated protein	HSPA5
DB08813	approved	P01100	Proto-oncogene c-Fos	FOS
DB00163	approved	P17252	Protein kinase C alpha type	PRKCA
DB00281	approved	Q15858	Sodium channel protein type 9 subunit alpha	SCN9A
DB00945	approved	O14920	Inhibitor of nuclear factor kappa-B kinase subunit beta	IKBKB
DB00054	approved	P05106	Integrin beta-3	ITGB3
DB00063	approved	P05106	Integrin beta-3	ITGB3
DB00775	approved	P05106	Integrin beta-3	ITGB3
DB01109	approved	P16109	P-selectin	SELP
DB06779	approved	P16109	P-selectin	SELP
DB08813	approved	P16109	P-selectin	SELP
DB00031	approved	P07355	Annexin A2	ANXA2
DB00054	approved	P09871	Complement C1s subcomponent	C1S
DB01197	approved	P09960	Leukotriene A-4 hydrolase	LTA4H
DB01207	approved	P24557	Thromboxane-A synthase	TBXAS1
DB00054	approved	P00736	Complement C1r subcomponent	C1R
DB00054	approved	P02745	Complement C1q subcomponent subunit A	C1QA
DB00054	approved	P02746	Complement C1q subcomponent subunit B	C1QB
DB00054	approved	P02747	Complement C1q subcomponent subunit C	C1QC
DB00054	approved	P08637	Low affinity immunoglobulin gamma Fc region receptor III-A	FCGR3A
DB00054	approved	P12318	Low affinity immunoglobulin gamma Fc region receptor II-a	FCGR2A
DB00054	approved	P31994	Low affinity immunoglobulin gamma Fc region receptor II-b	FCGR2B
DB00054	approved	P31995	Low affinity immunoglobulin gamma Fc region receptor II-c	FCGR2C
DB00031	approved	P05452	Tetranectin	CLEC3B
DB00031	approved	P05787	Keratin, type II cytoskeletal 8	KRT8
DB00031	approved	P27797	Calreticulin	CALR
DB00031	approved	Q07954	Prolow-density lipoprotein receptor-related protein 1	LRP1
DB00381	approved	Q00975	Voltage-dependent N-type calcium channel subunit alpha-1B	CACNA1B
DB00163	approved	P23743	Diacylglycerol kinase alpha	DGKA
DB00163	approved	P62714	Serine/threonine-protein phosphatase 2A catalytic subunit beta isoform	PPP2CB
DB00163	approved	P67775	Serine/threonine-protein phosphatase 2A catalytic subunit alpha isoform	PPP2CA
DB00381	approved	Q08289	Voltage-dependent L-type calcium channel subunit beta-2	CACNB2
DB00401	approved	Q08289	Voltage-dependent L-type calcium channel subunit beta-2	CACNB2
DB00622	approved	Q08289	Voltage-dependent L-type calcium channel subunit beta-2	CACNB2
DB01054	approved	Q08289	Voltage-dependent L-type calcium channel subunit beta-2	CACNB2
DB01115	approved	Q08289	Voltage-dependent L-type calcium channel subunit beta-2	CACNB2
DB06712	approved	Q08289	Voltage-dependent L-type calcium channel subunit beta-2	CACNB2
DB00381	approved	Q13698	Voltage-dependent L-type calcium channel subunit alpha-1S	CACNA1S
DB00401	approved	Q13698	Voltage-dependent L-type calcium channel subunit alpha-1S	CACNA1S
DB01054	approved	Q13698	Voltage-dependent L-type calcium channel subunit alpha-1S	CACNA1S
DB01115	approved	Q13698	Voltage-dependent L-type calcium channel subunit alpha-1S	CACNA1S
DB06712	approved	Q13698	Voltage-dependent L-type calcium channel subunit alpha-1S	CACNA1S
DB00381	approved	Q01668	Voltage-dependent L-type calcium channel subunit alpha-1D	CACNA1D
DB00401	approved	Q01668	Voltage-dependent L-type calcium channel subunit alpha-1D	CACNA1D
DB00622	approved	Q01668	Voltage-dependent L-type calcium channel subunit alpha-1D	CACNA1D
DB01054	approved	Q01668	Voltage-dependent L-type calcium channel subunit alpha-1D	CACNA1D
DB01115	approved	Q01668	Voltage-dependent L-type calcium channel subunit alpha-1D	CACNA1D
DB06712	approved	Q01668	Voltage-dependent L-type calcium channel subunit alpha-1D	CACNA1D
DB00227	approved	Q92769	Histone deacetylase 2	HDAC2
DB01054	approved	Q9NY47	Voltage-dependent calcium channel subunit alpha-2/delta-2	CACNA2D2
DB01244	approved	Q9NY47	Voltage-dependent calcium channel subunit alpha-2/delta-2	CACNA2D2
DB08885	approved	P49763	Placenta growth factor	PGF
DB00622	approved	Q01064	Calcium/calmodulin-dependent 3',5'-cyclic nucleotide phosphodiesterase 1B	PDE1B
DB01244	approved	Q01064	Calcium/calmodulin-dependent 3',5'-cyclic nucleotide phosphodiesterase 1B	PDE1B
DB00945	approved	P04637	Cellular tumor antigen p53	TP53
DB00945	approved	P25963	NF-kappa-B inhibitor alpha	NFKBIA
DB00381	approved	Q8IZS8	Voltage-dependent calcium channel subunit alpha-2/delta-3	CACNA2D3
DB06712	approved	Q8IZS8	Voltage-dependent calcium channel subunit alpha-2/delta-3	CACNA2D3
DB00381	approved	Q6TME4	Voltage-gated calcium channel beta 1 subunit splice variant CavB1d	CACNB1
DB00622	approved	P54750	Calcium/calmodulin-dependent 3',5'-cyclic nucleotide phosphodiesterase 1A	PDE1A
DB01244	approved	P54750	Calcium/calmodulin-dependent 3',5'-cyclic nucleotide phosphodiesterase 1A	PDE1A
DB01020	approved	P33402	Guanylate cyclase soluble subunit alpha-2	GUCY1A2
DB01076	approved	P35869	Aryl hydrocarbon receptor	AHR
DB08813	approved	P01106	Myc proto-oncogene protein	MYC
DB08885	approved	P49765	Vascular endothelial growth factor B	VEGFB
DB00598	approved	P35348	Alpha-1A adrenergic receptor	ADRA1A
DB00598	approved	P35368	Alpha-1B adrenergic receptor	ADRA1B
DB00598	approved	P25100	Alpha-1D adrenergic receptor	ADRA1D
DB00945	approved	P51812	Ribosomal protein S6 kinase alpha-3	RPS6KA3
DB00945	approved	Q00653	Nuclear factor NF-kappa-B p100 subunit	NFKB2
DB00945	approved	P19838	Nuclear factor NF-kappa-B p105 subunit	NFKB1
DB00945	approved	Q13131	5'-AMP-activated protein kinase catalytic subunit alpha-1	PRKAA1
DB00945	approved	P54646	5'-AMP-activated protein kinase catalytic subunit alpha-2	PRKAA2
DB00945	approved	Q9Y478	5'-AMP-activated protein kinase subunit beta-1	PRKAB1
DB00945	approved	O43741	5'-AMP-activated protein kinase subunit beta-2	PRKAB2
DB00945	approved	P54619	5'-AMP-activated protein kinase subunit gamma-1	PRKAG1
DB00945	approved	Q9UGJ0	5'-AMP-activated protein kinase subunit gamma-2	PRKAG2
DB00945	approved	Q9UGI9	5'-AMP-activated protein kinase subunit gamma-3	PRKAG3
DB08836	experimental	P12821	Angiotensin-converting enzyme	ACE
DB00224	approved	Q72874	HIV-1 Protease	pol
DB00224	approved	Q72874	HIV-1 Protease	pol
DB01319	approved	Q72874	HIV-1 Protease	pol
